1 **Culture and genomic analysis of *Symbiopectobacterium purcellii*, gen.nov. sp. nov.,**  
2 **isolated from the leafhopper *Empoasca decipiens***

3

4 **Pol Nadal-Jimenez<sup>1,\*</sup>, Stefanos Siozios<sup>1</sup>, Nigel Halliday<sup>2</sup>, Miguel Cámara<sup>2</sup> & Gregory**  
5 **D.D. Hurst<sup>1</sup>**

6

7 **Author affiliations:** <sup>1</sup>Institute of Infection, Veterinary and Ecological Sciences,  
8 University of Liverpool, Liverpool, UK; <sup>2</sup>The National Biofilms Innovation Centre,  
9 School of Life Sciences, University of Nottingham Biodiscovery Institute, University of  
10 Nottingham, UK.

11

12

13 **\*Correspondence:** Pol Nadal-Jimenez, University of Liverpool, polnadal@gmail.com

14

15

16

17

18

19

20

21

22

23

24

25

26

27

28

29

30

31

32

33 **ABSTRACT**

34 Bacterial endosymbionts are found in multiple arthropod species, where they  
35 play crucial roles as nutritional symbionts, defensive symbionts or reproductive  
36 parasites. Recent work has highlighted a new clade of heritable microbes within the  
37 gammaproteobacteria that enter into both obligate and facultative symbioses, with  
38 an obligately required unculturable symbiont recently given the name *Cand.*  
39 *Symbiopectobacterium*. In this study, we describe a culturable rod shaped non-  
40 flagellated bacterial symbiont from this clade isolated from the leafhopper  
41 *Empoasca decipiens*. The symbiont is related to the transovarially-transmitted 'BEV'  
42 bacterium that was first isolated from the leafhopper *Euscelidius variegatus* by  
43 Alexander Purcell, and we therefore name the symbiont *Symbiopectobacterium*  
44 *purcellii* sp. nov. gen. nov. We further report the closed genome sequence for *S.*  
45 *purcellii*. The genome is atypical for a heritable microbe, being large in size, without  
46 profound AT bias and with little evidence of pseudogenization. The genome is  
47 predicted to encode Type II, III and VI secretion systems and associated effectors and  
48 a non-ribosomal peptide synthase array likely to produce bioactive small molecules.  
49 Predicted metabolism is more complete than for other symbionts in the  
50 *Symbiopectobacterium* clade, and the microbe is predicted to synthesize a range of B  
51 vitamins. However, Biolog plate analysis indicate metabolism is depauperate  
52 compared to the sister clade, represented by *Pectobacterium carotovorum*. A  
53 quorum-sensing pathway related to that of *Pectobacterium* spp. (containing an  
54 overlapping *expl-expR1* pair in opposite directions and a "solo" *expR2*) is evidenced,  
55 and LC-MS/MS analysis reveals the presence of 3-hydroxy-C10-HSL as the sole *N*-  
56 acylhomoserine lactone (AHL) in our strain. This AHL profile is profoundly divergent  
57 from that of other *Erwinia* and *Pectobacterium* spp., which produce mostly 3-oxo-C6-  
58 and 3-oxo-C8-HSL and could aid group identification. Thus, this microbe denotes one  
59 that has lost certain pathways associated with a saprophytic lifestyle but represents  
60 an important baseline against which to compare other members of the genus  
61 *Symbiopectobacterium* that show more profound integration into host biology.

62

63 **KEYWORDS**

64 *Symbiopectobacterium*, *Empoasca*, symbiosis, leafhopper, quorum sensing

## 65 INTRODUCTION

66 It is now understood that microbes influence multiple aspects of animal  
67 biology (1). Symbiont contributions extend from involvement in the process of  
68 digestion in the gut, through anabolic activities and the supply of vitamins and amino  
69 acids, to protection against natural enemies and defence against prey/hosts (2).  
70 Conversely, other symbiotic microbes are pathogenic or parasitic, and many  
71 symbioses combine both parasitic and beneficial aspects. Levels of symbiont  
72 integration vary between symbioses (3). On the host axis, they vary from facultative  
73 relationships where the host does not require a particular symbiont, to obligate  
74 where the individual dies or becomes sterile in the absence of symbiosis. Likewise,  
75 symbionts vary in the degree to which they rely on a host – some only replicating  
76 within hosts with others having environmental replication. The process of symbiosis  
77 formation also varies – from arising within the host lifecycle through acquisition by  
78 the host or infection by the microbe, to being present through the host lifecycle,  
79 with symbiont transfer/transmission from parent to offspring.

80

81 Whilst arthropod-microbe symbioses are diverse in terms of the microbial  
82 partners, particular microbial taxa have established symbiosis with a number of host  
83 species, commonly establishing in new host species through a host switch event.  
84 Well-known ‘heritable symbionts’ found over a broad range of arthropods include  
85 *Wolbachia*, *Rickettsia*, *Spiroplasma*, *Cardinium* and *Arsenophonus* (4). The  
86 interactions found in these symbioses include obligate and facultative associations,  
87 and ones which are beneficial, parasitic or have a combination of features.

88

89 Recent research has added a new clade of insect symbionts, *Cand.*  
90 *Symbiopectobacterium*, to ‘the big five’ (5). The first member of this clade to be  
91 described was the BEV strain – an acronym for bacterium from *Euscelidius*  
92 *variegatus*, a planthopper host species. This strain was cultured (6), but never  
93 formally named. The symbiosis was characterized as one with vertical transmission,  
94 where the host’s reproduction was negatively impacted by the microbe. In addition,  
95 there was also transmission to other insects on the plant – thus establishing the  
96 symbiosis as a pathogenic one maintained through mixed modes of transmission (7).

97 Experiments also suggested the symbiont facilitated the transmission of  
98 phytoplasma from its bug host to plant (8). Later, the pest species *Cimex lectularius*  
99 (common bedbug) was observed to carry a heritable symbiont related to BEV (9).  
100 This symbiont has not been established in cell-free culture, and symbiosis is  
101 facultative from the host perspective: the bedbug does not require the symbiont.  
102 Following this, a third hemipteran – the bulrush bug *Chilacis* was observed to carry a  
103 related vertically transmitted symbiont housed in a gut mycetome, in what appears  
104 to be an obligate association, in which the host requires the symbiont (10). More  
105 recently, symbioses involving members of this clade have extended beyond  
106 Hemiptera hosts to nematodes, with Martinson et al (5) characterizing symbionts  
107 related to BEV as obligate partners of *Howardula* nematodes. They named this  
108 microbe *Cand. Symbiopectobacterium*, reflecting its symbiotic lifestyle and its sister  
109 relationship to the well-characterized genus *Pectobacterium*.

110

111 *Cand. Symbiopectobacterium* has thus emerged as a potentially widespread  
112 and significant symbiotic associate of invertebrates. The original culturable BEV  
113 isolate, on which the genus could be formally described, was lost and genomic  
114 information for this strain is partial (11). Recovering a model culturable member of  
115 the genus is important, as it allows formal description of the microbe, completion of  
116 a closed genome sequence against which reductive evolution in symbiosis can be  
117 measured and presents a system in which gene function may be investigated. In this  
118 paper, we report the isolation to pure culture of a member of this clade from the  
119 planthopper *Empoasca decipiens*. We further present and analyse the complete  
120 genome sequence of this microbe, assess its growth requirements compared to  
121 *Pectobacterium carotovorum* and analyse its quorum sensing-signalling system.

122

123

## 124 MATERIALS AND METHODS

### 125 Symbiont isolation, morphology *in vitro* and identification through 16S rRNA 126 sequence

127 Initial Cicadellidae samples with light green coloration were collected in  
128 Prince's Park, Liverpool in April 2018, scooping different plants with an insect net at a  
129 maximum height of 2m. Fresh specimens were transported alive to the lab and  
130 sacrificed by freezing at -20°C for 15 min. The insect specimens were surface  
131 sterilized by immersion in 70% ethanol and washed with sterile water to remove the  
132 remaining alcohol. Insect legs were excised with a sterile surgical blade and stored at  
133 -20°C for *post hoc* host species determination through DNA barcoding.

134  
135 The remainder of the insect body was mechanically crushed and resuspended  
136 in 100 µl of sterile water. An aliquot of 10 µl was plated on brain heart infusion (BHI,  
137 Oxoid, UK) agar and grown at 30°C for 6 d to allow the appearance of slow-growing  
138 bacterial colonies. Morphology was examined through Gram staining and scanning  
139 electron microscopy of overnight culture. To identify the bacterial species, we  
140 performed colony PCR of the 16S rRNA gene colonies emerging on the agar plates  
141 with primers 27F (AGAGTTTGATCMTGGCTCAG) (12) and 1492R(I)  
142 (GGTTACCTTGTTACGACTT) (13), and sequenced by Eurofins genomics, Germany.  
143 Sequences were manually curated and phylogenetic analysis performed based on  
144 the 16S rRNA gene sequences which included a large assemblage of members from  
145 the *Cand. Symbiopectobacterium* clade. To this end, 16S rRNA sequences were  
146 aligned using the SSU-ALIGN software (14). A Bayesian phylogeny was estimated  
147 with MrBayes v3.2.6 (15) by sampling across the GTR model space (nst=mixed,  
148 rates=gamma). Two independent runs were performed for 5,000,000 generations  
149 and sub-sampling every 500 generations using four Markov chains. The first 25% of  
150 the samples were discarded as burn-in.

151  
152 The leafhopper host was identified through DNA barcoding using the COI  
153 sequence. To this end, insect legs were mechanically crushed and resuspended in 50  
154 µl of sterile water and the genomic DNA (gDNA) was extracted using a Quick-DNA  
155 Universal kit (Zymo research, USA). 2 µl of the gDNA were added to a GoTaq® Green

156 Master Mix (Promega, USA) and used to amplify part of the mitochondrial  
157 cytochrome oxidase 1 (CO1) with primers C1-J-1718  
158 (GGAGGATTTGGAAATTGATTAGTTCC) and C1-N-2191  
159 (CCCGGTAAAATTTAAAATATAAACTTC) (16). The PCR program consisted of an initial  
160 denaturation step at 95°C for 5 min, followed by 30 cycles of DNA denaturation at  
161 94°C for 15s, primer annealing at 55°C for 45 seconds, and primer extension at 72°C  
162 for 1 min. A final extension was carried out at 72°C for 5 min. A few microliters of  
163 each PCR product were run on an agarose gel to assess the success of the PCR  
164 reaction and the remains cleaned through an Isolate II PCR and Gel kit (Bioline, USA)  
165 and sent for sequencing with primer C1-N-2191. Identity was checked through  
166 analysis against the Barcode of Life Database, BOLD.

167

#### 168 **In vitro Growth requirements**

169 BIOLOG GEN III plates (Cat. No. 1030) were used to ascertain the  
170 physiological and biochemical characteristics of *S. purcellii* SyEd1 *in vitro*, and these  
171 were conducted alongside *Pectobacterium carotovorum* subsp. *carotovorum* LMG  
172 02404<sup>T</sup> for comparison. Within this, we also performed the assay in the  
173 presence/absence of 0.4 % polygalacturonic acid PGA (Sigma, P3850), which is  
174 commonly used to induce the expression of plant cell wall-degrading enzymes (for  
175 preparation of PGA, see (17). For the BIOLOG GEN III assays, we used IF-A inoculating  
176 fluid (Biolog, Cat. No. 72401) with or without PGA supplementation to a final  
177 concentration of 0.4% PGA. Both bacterial species were grown overnight, diluted to  
178 an OD<sub>600</sub>= 0.4 and 50 µl of this aliquot were added to a tube containing IF-A fluid.  
179 The aliquot in the IF-A tube was homogeneously mixed using a vortex and 100 µl of  
180 this suspension was added to each of the 96 wells of the BIOLOG GEN III plate. The  
181 plate was subsequently incubated at 30°C without shaking.

182

#### 183 **Potato infection assays**

184 *Pectobacterium* spp. are well-known plant pathogens causing soft-rot disease  
185 in several plants including potatoes, carrots and cabbages. This damage is caused by  
186 a series of secreted enzymes (cellulases, proteases, pectate lyases (Pel), pectin  
187 lyases, and polygalacturonases) commonly referred to as plant cell wall-degrading

188 enzymes (PCWDEs). The presence of 15 putative PCWDEs and two copies of the KdgR  
189 regulator (associated to their expression) in *Symbiopectobacterium purcellii* led us to  
190 assess whether this symbiont retains the plant pathogenic activity of its sister clade,  
191 *Pectobacterium*. To this aim, virulence was tested in potatoes, using a method  
192 previously described in Nadal-Jimenez et al (18) with minor modifications. Briefly,  
193 potatoes were bought at local stores, washed with tap water, dried and surface  
194 sterilized with 70% ethanol. Slices about 0.5 cm thick were placed in sterile Petri  
195 dishes. Overnight cultures of *S. purcellii* SyEd1 and *Pectobacterium carotovorum* LMG  
196 02404<sup>T</sup> were diluted to an OD<sub>600</sub>=0.4, and 20 µl were placed at the centre of the  
197 potato slice. The same amount of sterile BHI medium was added to the negative  
198 controls. The plates were sealed with parafilm to avoid moisture loss and incubated  
199 at 25°C in dark conditions. Tissue maceration was assessed visually 24, 48 and 72 h  
200 after incubation.

201

202

### 203 **Symbiont Genome sequencing, assembly and annotation**

204 The genome of the symbiont was completed using a combination of short  
205 (Illumina) and long (nanopore) reads by MicrobesNG (Birmingham, UK) using their  
206 enhanced genome service. Briefly, Illumina sequencing was performed using the  
207 Nextera XT library prep protocol on a HiSeq platform (Illumina, San Diego, CA, USA)  
208 using a 250bp paired end protocol. Reads were adapter trimmed using Trimmomatic  
209 0.30, with a sliding window quality cutoff of Q15 (19). Long read genomic DNA  
210 libraries are prepared with Oxford Nanopore SQK-RBK004 kit (ONT, UK) using 400-  
211 500ng of HMW DNA and sequenced in a FLO-MIN106 (R.9.4.1) flow cell in a GridION  
212 (ONT, UK). Hybrid genome assembly of both short and long reads was performed  
213 using Unicycler version 0.4.0 under the normal mode (20). The final assembly was  
214 manually inspected for potential misassemblies by mapping the raw reads back to it.  
215 Genome annotation was performed with the NCBI Prokaryotic Genome Annotation  
216 Pipeline (21). Metabolic and functional assessment of the symbiont genome was  
217 conducted using the Kyoto Encyclopaedia of Genes and Genomes (KEGG) database  
218 (22). Identification of secondary metabolite biosynthesis gene clusters was  
219 performed using the antiSMASH server (23). Finally, prophage regions were

220 predicted using the PHAge Search Tool Enhanced Release (PHASTER) web server  
221 (24).

222

### 223 **Phylogenomic analysis**

224 The phylogenetic position of the symbiont was assessed based on the  
225 concatenated analysis of 527 single copy core proteins identified among 56 publicly  
226 available genomes. These include members of the closely related genera  
227 *Pectobacterium*, *Brenneria*, *Dickeya*, *Lonsdalea*, *Sodalis* and the recently  
228 characterized *Cand. Symbiopectobacterium* (5). Single copy orthologue protein  
229 sequences were identified using OrthoFinder v2.3.11 (25). A maximum likelihood  
230 phylogeny was inferred with IQ-TREE 2.0.3 [25] using the JTT+F+R3 substitution  
231 model selected using ModelFinder according to the Bayesian information criterion  
232 [26]. Clade support was assessed based on 1000 ultrafast bootstrap replicates [27].

233

### 234 **Analysis of *N*-acyl homoserine lactone synthesis**

235

236 *S. purcellii* SyEd1 cultures were grown in 5 ml of BHI medium at 30°C for 24h  
237 and 200 rpm. After incubation the cultures were centrifuged and the supernatant  
238 collected and filtered through a 0.2 mm filter (SLGP033RS, Millipore). 500 µl of  
239 acidified ethyl acetate was added to 1 ml of supernatant sample and the mixture was  
240 vortexed for 1-2 min. Subsequently. The mixture was centrifuged for 1 min to allow  
241 the formation of a clear interface between the aqueous and organic layer. The  
242 organic (upper) layer was transferred using a pipette (without disturbing the  
243 aqueous layer) to a new 2ml Eppendorf. The extraction process was repeated twice  
244 more, combining the extracts for each sample into one of approximately 1.5 ml  
245 extract. Upon completion, the samples were dried under vacuum in a centrifugal  
246 evaporator.

247 Dried extract samples were reconstituted in 50 µl of methanol (MeOH) prior  
248 to analysis. LC-MS/MS analysis of 5 µl sample injections were conducted using a  
249 Qtrap 6500 hybrid triple-quadrupole linear ion trap mass spectrometer in tandem  
250 with an Exion LC system (Sciex). The overall method was a modification of that  
251 described by Ortori et al (26). Chromatography was achieved using a Phenomenex



252 Gemini C18 column (3.0  $\mu$ m, 50 x 3.0 mm) with a constant flow rate of 450  $\mu$ l/min of  
253 mobile phase A (0.1 % (v/v) formic acid) and mobile phase B (0.1 % (v/v) formic acid  
254 in methanol). The LC gradient began at 10% B for 1.0 min, increased linearly to 50% B  
255 over 0.5 min, then to 99% B over 4.0 min. The composition remained at 99% B for  
256 1.5 min, decreased to 10% B over 0.1 min, and stayed at this composition for 2.9  
257 min. Analyte detection was conducted with the MS operating in MRM (multiple  
258 reaction monitoring) mode, screening the LC eluent for specific AHLs (unsubstituted,  
259 3-oxo and 3-OH AHLs with even chain lengths from C4-C14).

260

### 261 **Prevalence of symbiont in *Empoasca decipiens* leafhoppers**

262 In order to assess the prevalence of this bacterium in *E. decipiens*, we performed a  
263 PCR screening on various specimens. Additional insect collections were completed at  
264 the same location in August 2019 and tested for SyEd1 by PCR assay. Using the full-  
265 genome sequence of our cultured strain, we developed two set of specific PCR  
266 primers to amplify part of the DNA gyrase subunit (*gyrB*) gene of this bacterium:  
267 BEV\_gyrB\_F1 (CCGTGGTGTCTCGGTGAAAGTA) + BEV\_gyrB\_R1  
268 (TGGTCTTCTGTCAGCGTGTC) and BEV\_gyrB\_F2 (CTCGTGAAATGACACGACGC) +  
269 BEV\_gyrB\_R2 (CAGCAGTTCCACTTGTTTCGC). The gDNA was extracted in the same  
270 manner as for the leg samples and used as a template for the PCR reactions.

271

## 272 **RESULTS**

273

### 274 **Symbiont isolation and identification**

275 The bacterium grows under standard aerobic conditions in Brain heart  
276 infusion (BHI) medium (CM1032, Oxoid), forming circular white colonies approx. 2-3  
277 mm in diameter on BHI agar, and cultures emitted a pronounced plant-like odour.  
278 The bacterium is Gram negative, and SEM revealed it to be a non-flagellated rod  
279 shape, of length 1-1.5  $\mu$ m (Figure 1). The bacterium will also grow in LB (Miller)  
280 (110285, Millipore/Merck KGaA) although at a slower rate, and growth is inhibited  
281 by light.

282

283 Phylogenetic analysis based on the 16S rRNA gene (Accession number  
284 OK044380) placed the isolated microbe well within the recently characterized clade  
285 *Cand. Symbiopectobacterium* (Figure 2), a group of microbes commonly associated  
286 with arthropods and nematodes. Sequence of the CO-1 amplicons from the insect  
287 host revealed the leafhopper host to be *Empoasca decipiens* (Hemiptera,  
288 Cicadellidae), a common species of leafhopper in Europe. *Empoasca decipiens* has  
289 been implicated in the transmission of various plant pathogens (27), and is  
290 considered a pest in various crops (28).

291

### 292 **In vitro Growth requirements**

293 *S. purcellii* SyEd1 and *P. carotovorum* LMG 2404<sup>T</sup> were grown at 30°C in  
294 BIOLOG GEN III plates. For *P. carotovorum* LMG 2404<sup>T</sup>, the presence of the purple  
295 tetrazolium dye as a result of growth and respiration in the wells where the strains  
296 had grown was visible after 24 h, while the wells that did not supported the growth  
297 of this strain remained colourless. In the case of *S. purcellii* SyEd1, the plates had to  
298 be incubated for a total of 72h to allow bacterial growth. This is not surprising since,  
299 in our hands, *S. purcellii* SyEd1 grows slowly in BHI media (requiring up to 48h), and  
300 even slower in less rich media. Analyses indicated *S. purcellii* was considerably more  
301 fastidious than the comparator outgroup strain *P. carotovorum* LMG 2404<sup>T</sup> in terms  
302 of metabolites that supported growth (Table 1) but had broader resistance to  
303 xenobiotics than this strain (Table 2). Growth conditions for *S. purcellii* on Biolog  
304 analysis was only modestly altered by addition of PGA.

305

### 306 **Potato infection assays**

307 Potato slices infected with *S. purcellii* SyEd1 exhibited a complete absence of  
308 infection/ tissue maceration at the different time points tested (72h time point  
309 shown in Figure 3) in contrast to *P. carotovorum* LMG 02404<sup>T</sup>, used as positive  
310 control for infection. The assay was maintained for a week without any sign of  
311 infection being visible in *S. purcellii* SyEd1 infected potatoes.

312

### 313 **Genome sequence and assembly**

314 The genome of the symbiont presented as a single circular chromosome of  
315 circa 4.9 MB with an average GC content of 52.5% (Table 3). No plasmids were  
316 identified. The complete predicted gene set consists of 4,494 protein-coding genes  
317 (including 312 predicted pseudogenes), 7 ribosomal RNA operons (5S, 16S, 23S) and  
318 76 tRNAs. The average length of the protein-coding genes is 948 bp accounting for a  
319 coding density of about 86.2%. Pseudogenization rates were estimated to be circa  
320 7% (312 predicted pseudogenes). The main chromosome was predicted to contain  
321 six intact prophage regions and three additional incomplete fragments. The  
322 complete genome assembly and the raw reads have been submitted to the  
323 DDBJ/EMBL/GenBank database under the BioProject accession number  
324 PRJNA756769 (genome accession number CP081864).

325

### 326 **Phylogenomic and functional analysis**

327 To confirm the phylogenetic position of the *E. decipiens* symbiont we conducted a  
328 phylogenomic analysis base on the concatenated set of 527 single copy orthologue  
329 proteins across 56 related genomes (Figure 4). These results further support the  
330 placement of the symbiont in the *Cand. Symbiopectobacterium* clade.

331

332 The genome is predicted to encode type II, III and VI secretion systems alongside a  
333 wide array of predicted secreted toxins, compatible with its likely status as a  
334 symbiont of its insect host. Anti-SMASH predicted five genomic regions associated  
335 with small molecule production. Notable amongst these is a non-ribosomal peptide  
336 synthase (NRPS) region. It is unclear if the NRPS system produces siderophore  
337 molecules that permit growth in iron poor host environments, or antimicrobial  
338 compounds. In addition, anti-SMASH predicted putative gene clusters for the  
339 biosynthesis of thiopeptide, an aryl-polyene potentially providing defence against  
340 ROS, and betalactone synthesis. There is also a predicted homoserine lactone  
341 synthesis island *expI/expR1* that may be involved in sensing of microbial titre (see  
342 below); the genome encodes additional conserved elements of the Quorum sensing  
343 system, *expR2*, *gacA (expA)*, *gacS (expS)*, *rsmA* and *rsmB*, and *kdgR*. Finally, the  
344 genome encodes complete biosynthetic pathways for several B vitamins including  
345 thiamine (B1), riboflavin (B2), pantothenate (B5), biotin (B7), pyridoxine (B6) and

346 folate (B9). A broad array of complete amino acid biosynthesis pathways was also  
347 observed, including serine, threonine, cysteine, methionine, valine, leucine,  
348 isoleucine, arginine, ornithine, arginine, proline, histidine, tryptophan, phenylalanine  
349 and tyrosine. Vitamin and amino acid provision are common means through which  
350 symbionts contribute to host function. There are also 5 *pel* genes predicted to  
351 encoded pectate lyase enzymes. The failure of the strain to utilize pectin on Biolog  
352 plates or on potato tubers may thus be context dependent.

353

#### 354 **Analysis of homoserine lactones**

355

356 *S. purcellii* SyEd1 analysis using LC-MS/MS revealed the presence of a single  
357 AHL that was characterised as *N*-(3-hydroxydecanoyl)-L-homoserine lactone (3-OH-  
358 C10-HSL). Figure 5 shows the LC-MS/MS chromatogram obtained from the *S. purcellii*  
359 SyEd1 sample compared to the 3-OH-C10-HSL standard and the uncultured BHI  
360 medium. Members of the genus *Pectobacterium* have been reported to produce 3-  
361 oxo-C6-HSL, 3-oxo-C8-HSL, C10-HSL (29), but, to the best of our knowledge, the  
362 presence of 3-OH-C10-HSL as the sole AHL in *S. purcellii* is unreported in related  
363 genera. This trait may help to identify novel members of this genus that we presume  
364 may have been previously misidentified as *Pectobacterium* spp. associated to the  
365 plants where the leafhoppers feed.

366

#### 367 **Prevalence of *S. purcellii* in *E. decipiens* samples.**

368 Seven new *E. decipiens* specimens were collected and their identity  
369 confirmed by CO-1 amplification and sequencing. All samples were confirmed to be  
370 *E. decipiens* with >99.6% identity with previously deposited sequences in NCBI. The  
371 same gDNA extract was used to screen for the presence of the bacterial symbiont by  
372 PCR using our BEV\_gyrB\_F2 and BEV\_gyrB\_R2 primers. All seven samples produced  
373 an amplicon for *S. purcellii* (10), and the identity of the amplicon was confirmed  
374 through sequencing accounting for a 100% prevalence in the population tested  
375 (95%CI: 64% - 100%).

376

#### 377 **Description of *Symbiopectobacterium purcelli* gen. nov., sp. nov.**

378 *Symbiopectobacterium purcellii*. *Symbiopectobacterium* (L. n. *sym bio pecto*  
379 *bacterium*) references the related *Cand. Symbiopectobacterium* that is an obligate symbiont  
380 of nematode worms, this name reflecting the symbiotic habit of the microbe, and the  
381 relationship of the genus as sister to *Pectobacterium*. The species name *purcellii* [pur.cell ii.  
382 L. m. gen.] is given in reference to Alexander Purcell, who isolated the first member of this  
383 clade, which he named the BEV symbiont (bacterium from *Euscelidius variegatus*).

384 Gram-negative rod-shaped bacterium. Grows optimally at 30 °C in BHI medium in  
385 the dark forming colonies within 24-48 h. Using Biolog GENIII plates, *S. purcellii* responded  
386 positively to the following carbon sources: D-glucose, D-mannose, D-fructose, glycerol, N-  
387 acetyl glucosamine, L-rhamnose, and weaker to methyl pyruvate and acetic acid. Growth  
388 was inhibited at pH5, by 4% and 8% NaCl, by D-serine, minocycline and sodium bromate.  
389 Growth was not impaired by 1% sodium lactate, fusidic acid, Troleandomycin, Rifamycin S,  
390 Lincomycin, Guanidine HCl, Vancomycin, Tetrazolium Violet, Tetrazolium blue, Potassium  
391 tellurite, Nalidixic Acid, Lithium Chloride, Aztreonam, Sodium Butyrate. The microbe does  
392 not cause macerations on potato slices.

393 *Symbiopectobacterium purcellii* gen. nov. sp. nov. form a cluster with a variety of  
394 uncultured symbionts of insects and nematodes, as well as the previously cultured strain  
395 BEV.

396 The type strain is SyEd1 (LMG 32449, CECT 30436) and was isolated from *Empoasca*  
397 *decipiens* (Hexapoda: Hemiptera: Cicadellidae) from Liverpool UK (53.3868° N, 2.9565° W).  
398 The genome consists of a single circular chromosome of size 4.9MB and DNA G+C content is  
399 52.5 mol%. The 16S rRNA sequence of the type strain is available at accession OK044380.  
400 The complete genome assembly and the raw reads have been submitted to the  
401 DDBJ/EMBL/GenBank database under the BioProject accession number PRJNA756769  
402 (genome accession number CP081864).

403

404 **Acknowledgements** - We are thankful to Alison Beckett (University of Liverpool, UK)  
405 for SEM Electron microscopy imaging service; Sam Edwards (University of  
406 Copenhagen, DK) for assistance in *E. decipiens* collection; Nigel Gotts (University of  
407 Liverpool, UK) for assistance evaporating the AHL-containing extracts; and Rita  
408 Valente (Instituto Gulbenkian de Ciência, PT) for useful discussions about the  
409 *Pectobacterium* virulence assays. This work was funded by a BBSRC grant to GH

410 (grant BB/S017534/1). Miguel Cámara is partly funded by the National Biofilms  
411 Innovation Centre (NBIC) which is an Innovation and Knowledge Centre funded by  
412 the Biotechnology and Biological Sciences Research Council, Innovate UK and  
413 Hartree Centre (Award Number BB/R012415/1).

414

#### 415 **Conflicts of interest**

416 The authors declare that there are no conflicts of interest.

417

#### 418 **REFERENCES**

419

- 420 1. McFall-Ngai M, Hadfield MG, Bosch TCG, Carey H V., Domazet-Lošo T, Douglas  
421 AE, et al. Animals in a bacterial world, a new imperative for the life sciences.  
422 Vol. 110, Proceedings of the National Academy of Sciences of the United  
423 States of America. 2013. p. 3229–36.
- 424 2. Hurst GDD. Extended genomes: Symbiosis and evolution. Interface Focus  
425 [Internet]. 2017 [cited 2021 Sep 22];7(5). Available from:  
426 <https://royalsocietypublishing.org/doi/abs/10.1098/rsfs.2017.0001>
- 427 3. Gerardo N, Hurst G. Q&A: Friends (but sometimes foes) within: The complex  
428 evolutionary ecology of symbioses between host and microbes. BMC Biol  
429 [Internet]. 2017 Dec 27 [cited 2021 Sep 22];15(1):1–6. Available from:  
430 <https://bmcbiol.biomedcentral.com/articles/10.1186/s12915-017-0455-6>
- 431 4. Duron O, Bouchon D, Boutin S, Bellamy L, Zhou L, Engelstädter J, et al. The  
432 diversity of reproductive parasites among arthropods: Wolbachia do not walk  
433 alone. BMC Biol. 2008;6.
- 434 5. Martinson VG, Gawryluk RMR, Gowen BE, Curtis CI, Jaenike J, Perlman SJ.  
435 Multiple origins of obligate nematode and insect symbionts by a clade of  
436 bacteria closely related to plant pathogens. Proc Natl Acad Sci U S A [Internet].  
437 2020 Dec 15 [cited 2021 Sep 22];117(50):31979–86. Available from:  
438 <https://www.pnas.org/content/117/50/31979>
- 439 6. Purcell AH, Steiner T, Mégraud F, Bové J. In vitro isolation of a transovarially  
440 transmitted bacterium from the leafhopper *Euscelidius variegatus* (Hemiptera:  
441 Cicadellidae). J Invertebr Pathol. 1986;48(1):66–73.
- 442 7. Purcell AH, Suslow KG, Klein M. Transmission via plants of an insect  
443 pathogenic bacterium that does not multiply or move in plants. Microb Ecol  
444 [Internet]. 1994 Jan [cited 2021 Sep 22];27(1):19–26. Available from:  
445 <https://link.springer.com/article/10.1007/BF00170111>
- 446 8. Purcell AH, Suslow KG. Pathogenicity and effects on transmission of a  
447 mycoplasma-like organism of a transovarially infective bacterium on the  
448 leafhopper *Euscelidius variegatus* (Homoptera: Cicadellidae). J Invertebr  
449 Pathol. 1987;50(3):285–90.
- 450 9. Hypša V, Aksoy S. Phylogenetic characterization of two transovarially  
451 transmitted endosymbionts of the bedbug *Cimex lectularius* (Heteroptera:

- 452 Cimicidae). *Insect Mol Biol* [Internet]. 1997 [cited 2021 Sep 22];6(3):301–4.  
453 Available from: <https://pubmed.ncbi.nlm.nih.gov/9272448/>
- 454 10. Kuechler SM, Dettner K, Kehl S. Characterization of an obligate intracellular  
455 bacterium in the midgut epithelium of the bulrush bug *Chilacis typhae*  
456 (Heteroptera, Lygaeidae, Artheneinae). *Appl Environ Microbiol*.  
457 2011;77(9):2869–76.
- 458 11. Degnan PH, Bittleston LS, Hansen AK, Sabree ZL, Moran NA, Almeida RPP.  
459 Origin and examination of a leafhopper facultative endosymbiont. *Curr*  
460 *Microbiol* [Internet]. 2011 May [cited 2021 Sep 22];62(5):1565–72. Available  
461 from: </pmc/articles/PMC3069327/>
- 462 12. Lane, D. J. (1991). 16S/23S rRNA sequencing, p. 115-175. *In* E. Stackebrandt  
463 and M. Goodfellow (ed.), *Nucleic acid techniques in bacterial systematics*.  
464 John Wiley & Sons, New York. [Internet]. [cited 2021 Sep 22]. Available from:  
465 <http://www.sci epub.com/reference/56892>
- 466 13. Turner S, Pryer KM, Miao VPW, Palmer JD. Investigating deep phylogenetic  
467 relationships among cyanobacteria and plastids by small subunit rRNA  
468 sequence analysis. *J Eukaryot Microbiol* [Internet]. 1999 [cited 2021 Sep  
469 22];46(4):327–38. Available from:  
470 <https://pubmed.ncbi.nlm.nih.gov/10461381/>
- 471 14. Nawrocki EP. Structural RNA Homology Search and Alignment using  
472 Covariance Models. PhD thesis [Internet]. 2009 Jan 1 [cited 2021 Sep 22];282.  
473 Available from: <http://openscholarship.wustl.edu/etd/256>
- 474 15. Ronquist F, Teslenko M, Van Der Mark P, Ayres DL, Darling A, Höhna S, et al.  
475 Mrbayes 3.2: Efficient bayesian phylogenetic inference and model choice  
476 across a large model space. *Syst Biol* [Internet]. 2012 May [cited 2021 Sep  
477 22];61(3):539–42. Available from:  
478 <https://pubmed.ncbi.nlm.nih.gov/22357727/>
- 479 16. Simon C, Frati F, Beckenbach A, Crespi B, Liu H, Flook P. Evolution, weighting,  
480 and phylogenetic utility of mitochondrial gene sequences and a compilation of  
481 conserved polymerase chain reaction primers. *Ann Entomol Soc Am* [Internet].  
482 1994 Nov 1 [cited 2021 Sep 22];87(6):651–701. Available from:  
483 <https://academic.oup.com/aesa/article/87/6/651/19291>
- 484 17. Nadal-Jimenez P, Valente RS. Preparation of polygalacturonic acid (PGA) to  
485 study virulence in *Erwinia/Pectobacterium* [Internet]. *protocols.io*. 2021.  
486 Available from: <https://doi.org/10.17504/protocols.io.bydyps7w>
- 487 18. Jimenez PN, Koch G, Papaioannou E, Wahjudi M, Krzeslak J, Coenye T, et al.  
488 Role of PvdQ in *Pseudomonas aeruginosa* virulence under iron-limiting  
489 conditions. *Microbiology*. 2010;156(1):49–59.
- 490 19. Bolger AM, Lohse M, Usadel B. Trimmomatic: A flexible trimmer for Illumina  
491 sequence data. *Bioinformatics* [Internet]. 2014 Aug 1 [cited 2021 Sep  
492 22];30(15):2114–20. Available from:  
493 <https://academic.oup.com/bioinformatics/article/30/15/2114/2390096>
- 494 20. Wick RR, Judd LM, Gorrie CL, Holt KE. Unicycler: Resolving bacterial genome  
495 assemblies from short and long sequencing reads. *PLoS Comput Biol*  
496 [Internet]. 2017 Jun 1 [cited 2021 Sep 22];13(6):e1005595. Available from:  
497 <https://journals.plos.org/ploscompbiol/article?id=10.1371/journal.pcbi.1005595>  
498 95

- 499 21. Tatusova T, Dicuccio M, Badretdin A, Chetvernin V, Nawrocki EP, Zaslavsky L,  
500 et al. NCBI prokaryotic genome annotation pipeline. *Nucleic Acids Res.* 2016  
501 Aug 19;44(14):6614–24.
- 502 22. Kanehisa M, Goto S. KEGG: Kyoto Encyclopedia of Genes and Genomes.  
503 *Nucleic Acids Res [Internet]*. 2000 Jan 1 [cited 2021 Sep 22];28(1):27–30.  
504 Available from: /pmc/articles/PMC102409/
- 505 23. Blin K, Shaw S, Kloosterman AM, Charlop-Powers Z, Van Wezel GP, Medema  
506 MH, et al. AntiSMASH 6.0: Improving cluster detection and comparison  
507 capabilities. *Nucleic Acids Res.* 2021 Jul 2;49(W1):W29–35.
- 508 24. Arndt D, Grant JR, Marcu A, Sajed T, Pon A, Liang Y, et al. PHASTER: a better,  
509 faster version of the PHAST phage search tool. *Nucleic Acids Res [Internet]*.  
510 2016 Jul 8 [cited 2021 Sep 22];44(W1):W16–21. Available from:  
511 <https://www.readcube.com/articles/10.1093%2Fnar%2Fgkw387>
- 512 25. Emms DM, Kelly S. OrthoFinder: solving fundamental biases in whole genome  
513 comparisons dramatically improves orthogroup inference accuracy. *Genome*  
514 *Biol [Internet]*. 2015 Aug 6 [cited 2021 Sep 22];16(1):1–14. Available from:  
515 [https://genomebiology.biomedcentral.com/articles/10.1186/s13059-015-](https://genomebiology.biomedcentral.com/articles/10.1186/s13059-015-0721-2)  
516 [0721-2](https://genomebiology.biomedcentral.com/articles/10.1186/s13059-015-0721-2)
- 517 26. Ortori CA, Halliday N, Cámara M, Williams P, Barrett DA. LC-MS/MS  
518 quantitative analysis of quorum sensing signal molecules. *Methods Mol Biol*  
519 *[Internet]*. 2014 [cited 2021 Sep 22];1149:255–70. Available from:  
520 <https://pubmed.ncbi.nlm.nih.gov/24818911/>
- 521 27. Galetto L, Marzachì C, Demichelis S, Bosco D. Host Plant Determines the  
522 *Phytoplasma* Transmission Competence of *Empoasca decipiens* (Hemiptera:  
523 Cicadellidae). *J Econ Entomol.* 2011;104(2):360–6.
- 524 28. Fathi SAA, Nouri-Ganbalani G, Rafiee-Dastjerdi H. Life cycle parameters of  
525 *Empoasca decipiens* Paoli (Hom.: Cicadellidae) on four potato cultivars  
526 (*Solanum tuberosum* L.) in Iran. *J Entomol.* 2009;6(2):96–101.
- 527 29. Barnard AML, Salmond GPC. Quorum sensing in *Erwinia* species. *Anal Bioanal*  
528 *Chem.* 2007;387(2):415–23.  
529  
530  
531  
532



533 **Table 1: Utilization of carbon sources for Growth by *S. purcellii* in the presence and**  
 534 **absence of PGA, with comparison to *Pectobacterium carotovorum* LMG 2404<sup>T</sup>. +++:**  
 535 **strong growth; ++: medium growth; +: weak growth; and -: no growth.**  
 536

|                          | <i>S. purcellii</i> | <i>S. purcellii</i><br>+ PGA | <i>P. carotovorum.</i><br>LMG 2404 | <i>P. carotovorum</i><br>LMG 2404 + PGA |
|--------------------------|---------------------|------------------------------|------------------------------------|-----------------------------------------|
| Dextrin                  | -                   | -                            | +++                                | +++                                     |
| D-maltose                | -                   | -                            | +++                                | +++                                     |
| D-Trehalose              | -                   | -                            | +++                                | +++                                     |
| D-Cellobiose             | -                   | -                            | +++                                | +++                                     |
| Gentiobiose              | -                   | -                            | +++                                | +++                                     |
| Sucrose                  | -                   | -                            | +++                                | +++                                     |
| D-Turanose               | -                   | -                            | +++                                | +++                                     |
| Stachyose                | -                   | -                            | +++                                | +++                                     |
| D-raffinose              | -                   | -                            | +++                                | +++                                     |
| $\alpha$ -D-lactose      | -                   | -                            | +++                                | +++                                     |
| D-melibiose              | -                   | -                            | +++                                | +++                                     |
| B-Methyl-D-Glucoside     | -                   | -                            | +++                                | +++                                     |
| D-Salicin                | -                   | -                            | +++                                | +++                                     |
| N-Acetyl-D-Glucosamine   | +++                 | +++                          | +++                                | +++                                     |
| N-Acetyl-B-D-Mannosamine | -                   | -                            | +++                                | +++                                     |
| N-Acetyl-D-Galactosamine | -                   | -                            | +++                                | +++                                     |
| N-Acetyl Neuraminic Acid | -                   | -                            | +++                                | +++                                     |
| $\alpha$ -D-Glucose      | +++                 | +++                          | +++                                | +++                                     |
| D-mannose                | +++                 | +++                          | +++                                | +++                                     |
| D-Fructose               | +++                 | +++                          | +++                                | +++                                     |
| D-Galactose              | -                   | -                            | +++                                | +++                                     |
| 3-Methyl Glucose         | -                   | -                            | +++                                | +++                                     |
| D-Fucose                 | -                   | -                            | +++                                | +++                                     |
| L-Fucose                 | -                   | -                            | +++                                | +++                                     |
| L-Rhamnose               | +++                 | +                            | +++                                | +++                                     |
| Inosine                  | -                   | -                            | +++                                | +++                                     |
| D-sorbitol               | -                   | -                            | +++                                | +++                                     |
| D-mannitol               | -                   | -                            | +++                                | +++                                     |
| D-Arabitol               | -                   | -                            | +++                                | +++                                     |
| myo-inositol             | -                   | -                            | +++                                | +++                                     |
| Glycerol                 | +++                 | +++                          | +++                                | +++                                     |
| D-Glucose-6-PO4          | -                   | -                            | +++                                | +++                                     |
| D-Fructose-6-PO4         | -                   | -                            | +++                                | +++                                     |
| D-Aspartic Acid          | -                   | -                            | +++                                | +++                                     |
| D-Serine                 | -                   | -                            | +++                                | +++                                     |
| Gelatin                  | -                   | -                            | +++                                | +++                                     |
| Glycyl-L-Proline         | -                   | -                            | +++                                | +++                                     |

|                                     |   |    |     |     |
|-------------------------------------|---|----|-----|-----|
| <i>L-Alanine</i>                    | - | -  | +++ | +++ |
| <i>L-Arginine</i>                   | - | -  | +++ | +++ |
| <i>L-Aspartic Acid</i>              | - | -  | +++ | +++ |
| <i>L-Glutamic Acid</i>              | - | -  | +++ | +++ |
| <i>L-Histidine</i>                  | - | -  | -   | -   |
| <i>L-Pyroglutamic Acid</i>          | - | -  | -   | -   |
| <i>L-Serine</i>                     | - | -  | +++ | +++ |
| <i>Pectin</i>                       | - | -  | +++ | +++ |
| <i>D-Galacturonic acid</i>          | - | -  | +++ | +++ |
| <i>L-Galactonic Acid Lactone</i>    | - | -  | +++ | +++ |
| <i>D-Gluconic Acid</i>              | - | -  | +++ | +++ |
| <i>D-Glucuronic Acid</i>            | - | -  | +++ | +++ |
| <i>Glucuronamide</i>                | - | -  | +++ | +++ |
| <i>Mucic Acid</i>                   | - | -  | +++ | +++ |
| <i>Quinic Acid</i>                  | - | -  | -   | -   |
| <i>D-Saccharic Acid</i>             | - | -  | +++ | +++ |
| <i>ρ-hydroxy phenyl acetic acid</i> | - | -  | -   | -   |
| <i>Methyl Pyruvate</i>              | + | +  | +++ | +++ |
| <i>D-Lactic Acid Methyl Ester</i>   | - | -  | -   | -   |
| <i>L-Lactic acid</i>                | - | -  | -   | -   |
| <i>Citric Acid</i>                  | - | -  | +++ | +++ |
| <i>α-Keto-Glutaric-Acid</i>         | - | -  | -   | -   |
| <i>D-Malic Acid</i>                 | - | -  | -   | -   |
| <i>L-Malic Acid</i>                 | - | -  | +++ | +++ |
| <i>Bromo-Succinic Acid</i>          | - | -  | +++ | +++ |
| <i>Tween-40</i>                     | - | -  | -   | +++ |
| <i>Gamma-Amino-Butyric acid</i>     | - | -  | -   | +++ |
| <i>α-Hydroxy-Butyric Acid</i>       | - | -  | -   | +++ |
| <i>B-Hydroxy-D-L-Butyric Acid</i>   | - | -  | -   | +++ |
| <i>α-Keto-Butyric-Acid</i>          | - | ++ | -   | +++ |
| <i>Acetoacetic Acid</i>             | - | -  | +   | +++ |
| <i>Propionic Acid</i>               | - | -  | -   | -   |
| <i>Acetic Acid</i>                  | + | +  | +++ | +++ |
| <i>Formic Acid</i>                  | - | -  | +++ | +++ |

537

538

539 Table 2: Impact of environmental and xenobiotic stress conditions on *S. purcellii*  
 540 growth on Biolog III plates compared to *P. carotovorum*, in the presence/absence of  
 541 PGA. +++: maintains full growth under condition stated, ++: medium growth; +: weak  
 542 growth; and - :no growth under condition stated.  
 543

|                            | <i>S. purcellii</i> | <i>S. purcellii</i><br>+ PGA | <i>P. carotovorum</i><br>LMG 2404 <sup>T</sup> | <i>P. carotovorum</i><br>LMG 2404 <sup>T</sup> + PGA |
|----------------------------|---------------------|------------------------------|------------------------------------------------|------------------------------------------------------|
| <i>pH 6</i>                | +++                 | +++                          | +++                                            | +++                                                  |
| <i>pH 5</i>                | -                   | -                            | -                                              | -                                                    |
| <i>1% NaCl</i>             | +++                 | +++                          | +++                                            | +++                                                  |
| <i>4% NaCl</i>             | +                   | +                            | +++                                            | +++                                                  |
| <i>8% NaCl</i>             | -                   | -                            | -                                              | -                                                    |
| <i>1% Sodium lactate</i>   | +++                 | +++                          | +++                                            | +++                                                  |
| <i>Fusidic acid</i>        | +++                 | +++                          | +++                                            | +++                                                  |
| <i>D-Serine</i>            | -                   | +++                          | -                                              | -                                                    |
| <i>Troleandomycin</i>      | +++                 | +++                          | +++                                            | +++                                                  |
| <i>Rifamycin SV</i>        | +++                 | +++                          | +++                                            | +++                                                  |
| <i>Minocycline</i>         | -                   | +++                          | -                                              | -                                                    |
| <i>Lincomycin</i>          | ++                  | ++                           | +++                                            | +++                                                  |
| <i>Guanidine HCl</i>       | ++                  | ++                           | +++                                            | +++                                                  |
| <i>Niaproof 4</i>          | ++                  | ++                           | +++                                            | +++                                                  |
| <i>Vancomycin</i>          | +++                 | +++                          | +++                                            | +++                                                  |
| <i>Tetrazolium Violet</i>  | ++                  | ++                           | +++                                            | +++                                                  |
| <i>Tetrazolium Blue</i>    | +++                 | +++                          | +++                                            | +++                                                  |
| <i>Nalidixic Acid</i>      | ++                  | ++                           | -                                              | -                                                    |
| <i>Lithium Chloride</i>    | +++                 | +++                          | +++                                            | +++                                                  |
| <i>Potassium Tellurite</i> | +++                 | +++                          | -                                              | -                                                    |
| <i>Aztreonam</i>           | +++                 | +++                          | -                                              | -                                                    |
| <i>Sodium Butyrate</i>     | ++                  | ++                           | +++                                            | +++                                                  |
| <i>Sodium Bromate</i>      | -                   | -                            | -                                              | -                                                    |

544

545

546

547 **Table 3.** Genome features of the *Symbiopectobacterium purcellii* strain SyEd1  
548 isolated from the leafhopper *Empoasca decipiens*.  
549

|                         |                  |
|-------------------------|------------------|
| Chromosome size (bp)    | 4,942,431        |
| Plasmids                | no               |
| GC contents (%)         | 52.5             |
| Number of predicted CDS | 4,494            |
| Number of pseudogenes   | 312              |
| Average CDS length (bp) | 948              |
| Coding density (%)      | 86.2             |
| Number of rRNA operons  | 7 (5S, 16S, 23S) |
| Number of tRNAs         | 76               |

550  
551

552 Figure 1: SEM of *S. purcellii* SyEd1.

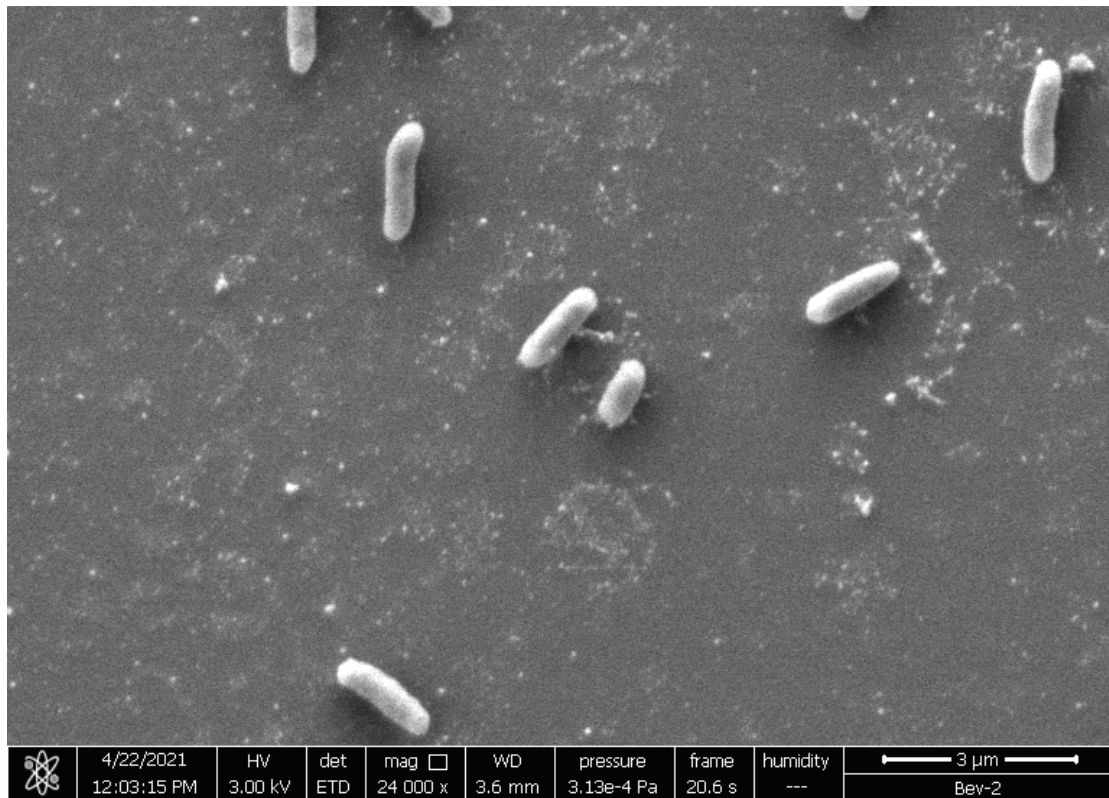

553

554

555

556 Figure 2: Phylogenetic affiliation of the 16S rRNA of *S. purcellii* compared to other  
 557 strains, as estimated with Mr Bayes. Numbers on nodes represent posterior  
 558 probability.

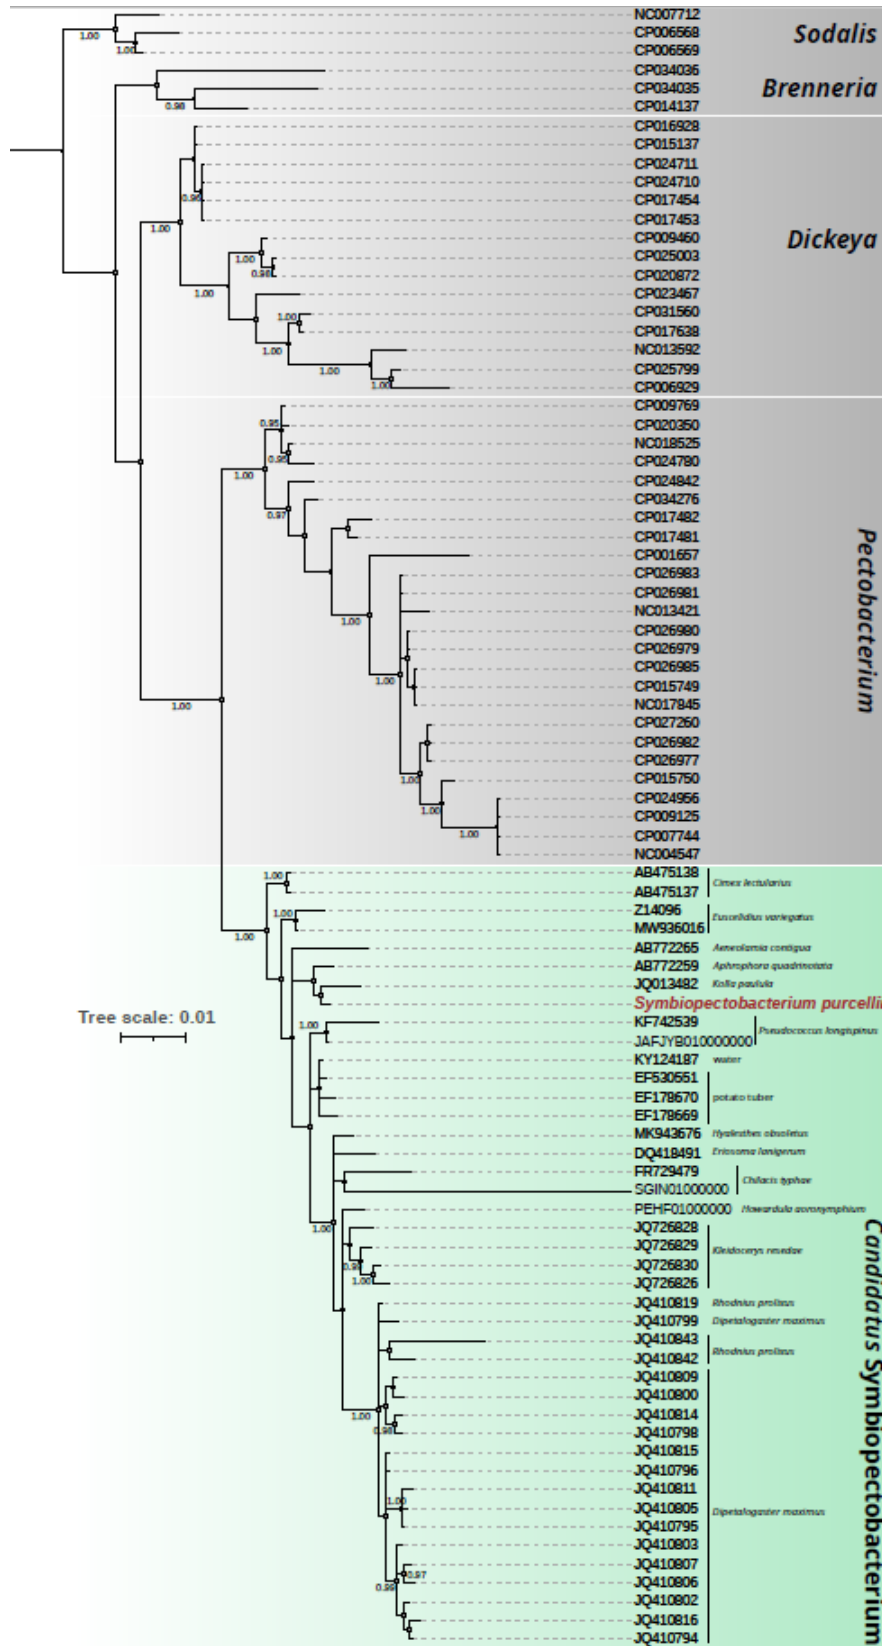

560 Figure 3: Virulence assay in potatoes.

561

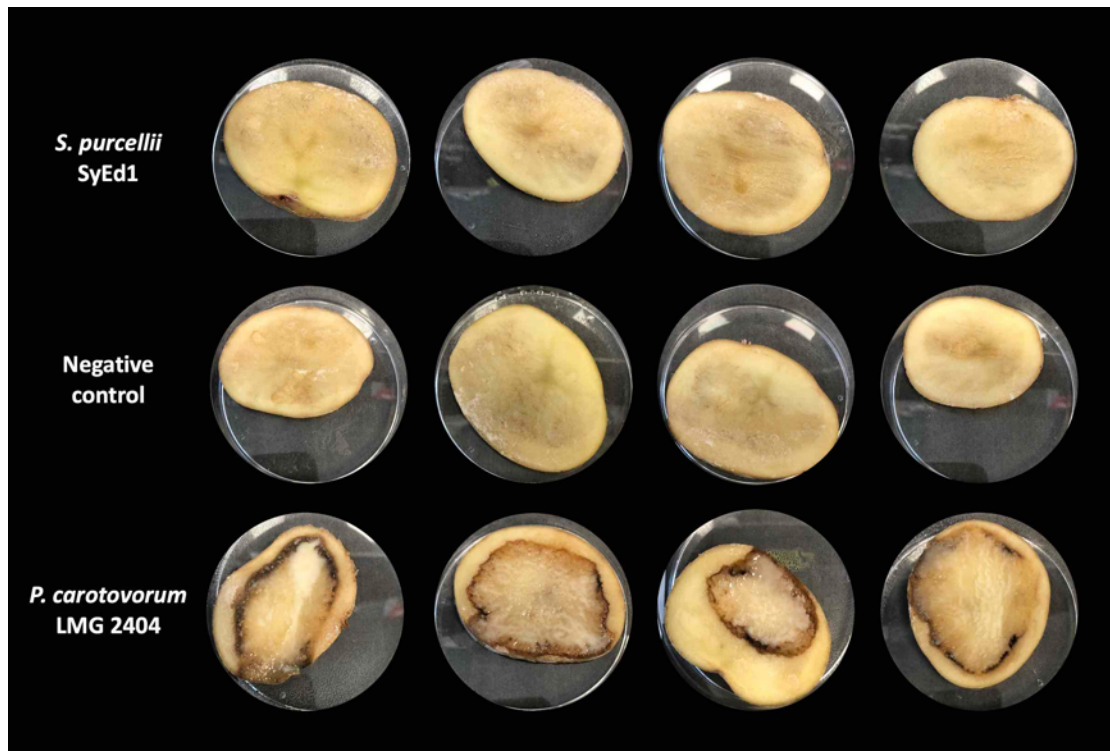

562

563

564

565 Figure 4: Affiliation of *S. purcellii* with other bacteria as estimated using IQTREE  
566 based on 527 shared single copy orthologues. Coloured dots on nodes represent  
567 bootstrap support.

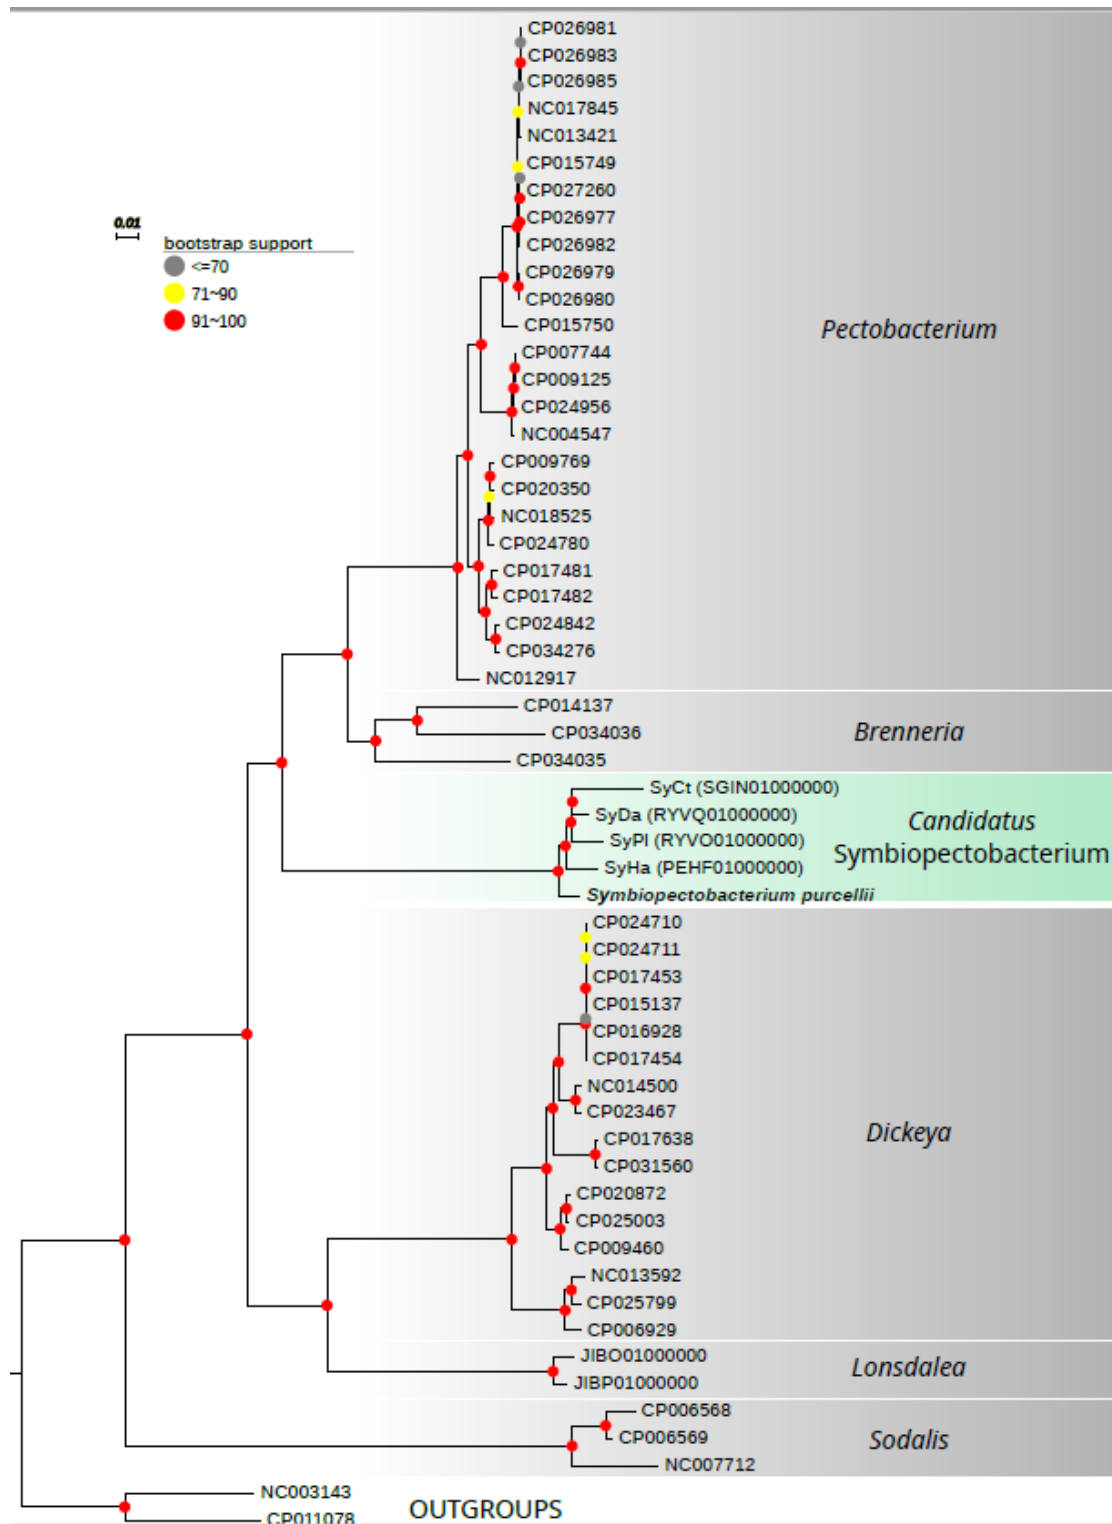

568

569



570 Figure 5: LC-MS/MS of an extraction of *S. purcellii* SyEd1 grown in BHI medium (A), 3-  
571 OH-C10-HSL standard (B) and negative control using a sterile BHI medium extract (C).

572

573

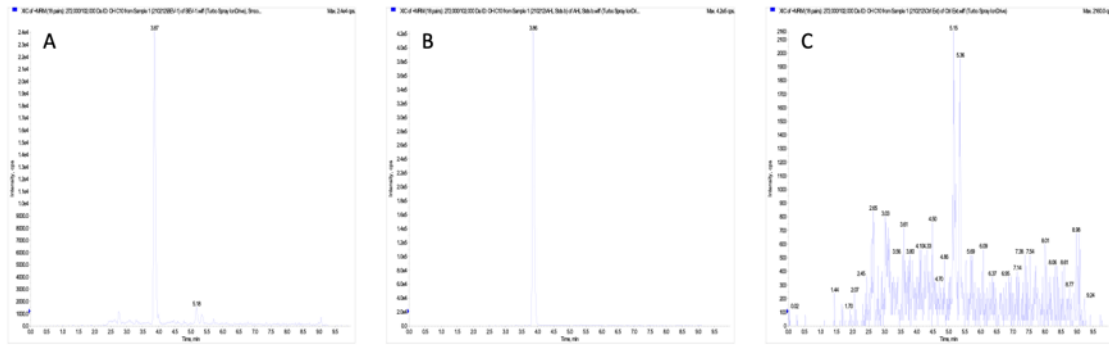

574

575

576

577

578
